# Supplementary material for: Hepatobiliary anastomotic leakage: a narrative review of definitions, grading systems, and consequences of leaks
Source: PubMed Central journal article supplement — Transl Gastroenterol Hepatol. 2024 Sep 13;9:70. doi: 10.21037/tgh-24-9 (PMC11535784; doi:10.21037/tgh-24-9), 2024-09-13
Supplement: tgh-09-24-9-coif.pdf [file tgh-09-24-9-coif.pdf]

## ICMJE DISCLOSURE FORM

**Date:** 24-April-2024

**Your Name:** Olivia Rennie

**Manuscript Title:** Hepatobiliary Anastomotic Leakage: A Narrative Review of Definitions, Grading Systems, and Consequences of Leaks

**Manuscript number (if known):** TGH-24-9-CL

In the interest of transparency, we ask you to disclose all relationships/activities/interests listed below that are related to the content of your manuscript. "Related" means any relation with for-profit or not-for-profit third parties whose interests may be affected by the content of the manuscript. Disclosure represents a commitment to transparency and does not necessarily indicate a bias. If you are in doubt about whether to list a relationship/activity/interest, it is preferable that you do so.

The following questions apply to the author's relationships/activities/interests as they relate to the current manuscript only.

The author's relationships/activities/interests should be defined broadly. For example, if your manuscript pertains to the epidemiology of hypertension, you should declare all relationships with manufacturers of antihypertensive medication, even if that medication is not mentioned in the manuscript.

In item #1 below, report all support for the work reported in this manuscript without time limit. For all other items, the time frame for disclosure is the past 36 months.

|                                                           |                                                                                                                                                                                | Name all entities with whom you have this relationship or indicate none (add rows as needed) | Specifications/Comments (e.g., if payments were made to you or to your institution) |
|-----------------------------------------------------------|--------------------------------------------------------------------------------------------------------------------------------------------------------------------------------|----------------------------------------------------------------------------------------------|-------------------------------------------------------------------------------------|
| <b>Time frame: Since the initial planning of the work</b> |                                                                                                                                                                                |                                                                                              |                                                                                     |
| 1                                                         | All support for the present manuscript (e.g., funding, provision of study materials, medical writing, article processing charges, etc.)<br><b>No time limit for this item.</b> | FluidAI Medical                                                                              | The author is a full-time permanent employee of FluidAI Medical.                    |
|                                                           |                                                                                                                                                                                |                                                                                              |                                                                                     |
|                                                           |                                                                                                                                                                                |                                                                                              |                                                                                     |
|                                                           |                                                                                                                                                                                |                                                                                              |                                                                                     |
|                                                           |                                                                                                                                                                                |                                                                                              |                                                                                     |
|                                                           |                                                                                                                                                                                |                                                                                              |                                                                                     |
| <b>Time frame: past 36 months</b>                         |                                                                                                                                                                                |                                                                                              |                                                                                     |
| 2                                                         | Grants or contracts from any entity (if not indicated in item #1 above).                                                                                                       | N/A                                                                                          | N/A                                                                                 |
|                                                           |                                                                                                                                                                                |                                                                                              |                                                                                     |
| 3                                                         | Royalties or licenses                                                                                                                                                          | N/A                                                                                          | N/A                                                                                 |
|                                                           |                                                                                                                                                                                |                                                                                              |                                                                                     |
|                                                           |                                                                                                                                                                                |                                                                                              |                                                                                     |

|    |                                                                                                              |                 |                                                                                                                                                                                                                          |
|----|--------------------------------------------------------------------------------------------------------------|-----------------|--------------------------------------------------------------------------------------------------------------------------------------------------------------------------------------------------------------------------|
| 4  | Consulting fees                                                                                              | N/A             | N/A                                                                                                                                                                                                                      |
| 5  | Payment or honoraria for lectures, presentations, speakers bureaus, manuscript writing or educational events | FluidAI Medical | The author is a full-time permanent employee of FluidAI Medical, and supports manuscript writing in the area of gastrointestinal and related surgeries, and studies related to research behind FluidAI's medical device. |
| 6  | Payment for expert testimony                                                                                 | N/A             | N/A                                                                                                                                                                                                                      |
| 7  | Support for attending meetings and/or travel                                                                 | FluidAI Medical | The author is a full-time permanent employee of FluidAI Medical and is supported in attending conferences and meetings related to the topics covered in the manuscript.                                                  |
| 8  | Patents planned, issued or pending                                                                           | N/A             | N/A                                                                                                                                                                                                                      |
| 9  | Participation on a Data Safety Monitoring Board or Advisory Board                                            | N/A             | N/A                                                                                                                                                                                                                      |
| 10 | Leadership or fiduciary role in other board, society, committee or advocacy group, paid or unpaid            | N/A             | N/A                                                                                                                                                                                                                      |
| 11 | Stock or stock options                                                                                       | FluidAI Medical | As an employee for FluidAI Medical, the author receives stock options as part of annual compensation.                                                                                                                    |
| 12 | Receipt of equipment, materials, drugs, medical writing, gifts or other services                             | N/A             | N/A                                                                                                                                                                                                                      |
| 13 | Other financial or non-financial interests                                                                   | N/A             | N/A                                                                                                                                                                                                                      |

**Please summarize the above conflict of interest in the following box:**

Olivia Rennie is a full-time permanent employee of FluidAI Medical, a medical device company that works on early prediction of postoperative complications, including anastomotic leaks. The company contributes to research associated with this manuscript in the following ways: clinical interest in the topic of this manuscript; attendance at conferences/educational events related to this article's content, travel related to this article's content, and stock options with the company. The author declares no other COIs.

Please place an "X" next to the following statement to indicate your agreement:

X I certify that I have answered every question and have not altered the wording of any of the questions on this form.

## ICMJE DISCLOSURE FORM

**Date:** 23-April-2024

**Your Name:** Manaswi Sharma

**Manuscript Title:** Hepatobiliary Anastomotic Leakage: A Narrative Review of Definitions, Grading Systems, and Consequences of Leaks

**Manuscript number (if known):** TGH-24-9-CL

In the interest of transparency, we ask you to disclose all relationships/activities/interests listed below that are related to the content of your manuscript. "Related" means any relation with for-profit or not-for-profit third parties whose interests may be affected by the content of the manuscript. Disclosure represents a commitment to transparency and does not necessarily indicate a bias. If you are in doubt about whether to list a relationship/activity/interest, it is preferable that you do so.

The following questions apply to the author's relationships/activities/interests as they relate to the current manuscript only.

The author's relationships/activities/interests should be defined broadly. For example, if your manuscript pertains to the epidemiology of hypertension, you should declare all relationships with manufacturers of antihypertensive medication, even if that medication is not mentioned in the manuscript.

In item #1 below, report all support for the work reported in this manuscript without time limit. For all other items, the time frame for disclosure is the past 36 months.

|                                                           |                                                                                                                                                                                | Name all entities with whom you have this relationship or indicate none (add rows as needed) | Specifications/Comments (e.g., if payments were made to you or to your institution) |
|-----------------------------------------------------------|--------------------------------------------------------------------------------------------------------------------------------------------------------------------------------|----------------------------------------------------------------------------------------------|-------------------------------------------------------------------------------------|
| <b>Time frame: Since the initial planning of the work</b> |                                                                                                                                                                                |                                                                                              |                                                                                     |
| 1                                                         | All support for the present manuscript (e.g., funding, provision of study materials, medical writing, article processing charges, etc.)<br><b>No time limit for this item.</b> | FluidAI Medical                                                                              | The author is a full-time permanent employee of FluidAI Medical.                    |
|                                                           |                                                                                                                                                                                |                                                                                              |                                                                                     |
|                                                           |                                                                                                                                                                                |                                                                                              |                                                                                     |
|                                                           |                                                                                                                                                                                |                                                                                              |                                                                                     |
|                                                           |                                                                                                                                                                                |                                                                                              |                                                                                     |
|                                                           |                                                                                                                                                                                |                                                                                              |                                                                                     |
| <b>Time frame: past 36 months</b>                         |                                                                                                                                                                                |                                                                                              |                                                                                     |
| 2                                                         | Grants or contracts from any entity (if not indicated in item #1 above).                                                                                                       | N/A                                                                                          | N/A                                                                                 |
|                                                           |                                                                                                                                                                                |                                                                                              |                                                                                     |
| 3                                                         | Royalties or licenses                                                                                                                                                          | N/A                                                                                          | N/A                                                                                 |
|                                                           |                                                                                                                                                                                |                                                                                              |                                                                                     |
| 4                                                         | Consulting fees                                                                                                                                                                | N/A                                                                                          | N/A                                                                                 |

|    |                                                                                                              |                 |                                                                                                                                                                         |
|----|--------------------------------------------------------------------------------------------------------------|-----------------|-------------------------------------------------------------------------------------------------------------------------------------------------------------------------|
|    |                                                                                                              |                 |                                                                                                                                                                         |
| 5  | Payment or honoraria for lectures, presentations, speakers bureaus, manuscript writing or educational events | N/A             | N/A                                                                                                                                                                     |
| 6  | Payment for expert testimony                                                                                 | N/A             | N/A                                                                                                                                                                     |
| 7  | Support for attending meetings and/or travel                                                                 | FluidAI Medical | The author is a full-time permanent employee of FluidAI Medical and is supported in attending conferences and meetings related to the topics covered in the manuscript. |
| 8  | Patents planned, issued or pending                                                                           | N/A             | N/A                                                                                                                                                                     |
| 9  | Participation on a Data Safety Monitoring Board or Advisory Board                                            | N/A             | N/A                                                                                                                                                                     |
| 10 | Leadership or fiduciary role in other board, society, committee or advocacy group, paid or unpaid            | N/A             | N/A                                                                                                                                                                     |
| 11 | Stock or stock options                                                                                       | FluidAI Medical | As an employee for FluidAI Medical, the author receives stock options as part of annual compensation.                                                                   |
| 12 | Receipt of equipment, materials, drugs, medical writing, gifts or other services                             | N/A             | N/A                                                                                                                                                                     |
| 13 | Other financial or non-financial interests                                                                   | N/A             | N/A                                                                                                                                                                     |

**Please summarize the above conflict of interest in the following box:**

Manaswi Sharma is a full-time permanent employee of FluidAI Medical, a medical device company that works on early prediction of postoperative complications, including anastomotic leaks. The author holds clinical interest and professional expertise in the topics explored within this article. The author also attends meetings/travel related to content in this article through their role at FluidAI Medical, and owns stock options with the company.

The author declares no other COIs.

**Please place an "X" next to the following statement to indicate your agreement:**

**X** I certify that I have answered every question and have not altered the wording of any of the questions on this form.

## ICMJE DISCLOSURE FORM

**Date:** 23-April-2024

**Your Name:** Nour Helwa

**Manuscript Title:** Hepatobiliary Anastomotic Leakage: A Narrative Review of Definitions, Grading Systems, and Consequences of Leaks

**Manuscript number (if known):** TGH-24-9-CL

In the interest of transparency, we ask you to disclose all relationships/activities/interests listed below that are related to the content of your manuscript. "Related" means any relation with for-profit or not-for-profit third parties whose interests may be affected by the content of the manuscript. Disclosure represents a commitment to transparency and does not necessarily indicate a bias. If you are in doubt about whether to list a relationship/activity/interest, it is preferable that you do so.

The following questions apply to the author's relationships/activities/interests as they relate to the current manuscript only.

The author's relationships/activities/interests should be defined broadly. For example, if your manuscript pertains to the epidemiology of hypertension, you should declare all relationships with manufacturers of antihypertensive medication, even if that medication is not mentioned in the manuscript.

In item #1 below, report all support for the work reported in this manuscript without time limit. For all other items, the time frame for disclosure is the past 36 months.

|                                                           |                                                                                                                                                                                | Name all entities with whom you have this relationship or indicate none (add rows as needed) | Specifications/Comments (e.g., if payments were made to you or to your institution)                                          |
|-----------------------------------------------------------|--------------------------------------------------------------------------------------------------------------------------------------------------------------------------------|----------------------------------------------------------------------------------------------|------------------------------------------------------------------------------------------------------------------------------|
| <b>Time frame: Since the initial planning of the work</b> |                                                                                                                                                                                |                                                                                              |                                                                                                                              |
| 1                                                         | All support for the present manuscript (e.g., funding, provision of study materials, medical writing, article processing charges, etc.)<br><b>No time limit for this item.</b> | NERv Technology Inc. (DBA FluidAI Medical)                                                   | I am a full-time employee at FluidAI Medical which focuses on the early predication of leaks after gastrointestinal surgery. |
|                                                           |                                                                                                                                                                                |                                                                                              |                                                                                                                              |
|                                                           |                                                                                                                                                                                |                                                                                              |                                                                                                                              |
|                                                           |                                                                                                                                                                                |                                                                                              |                                                                                                                              |
|                                                           |                                                                                                                                                                                |                                                                                              |                                                                                                                              |
|                                                           |                                                                                                                                                                                |                                                                                              |                                                                                                                              |
| <b>Time frame: past 36 months</b>                         |                                                                                                                                                                                |                                                                                              |                                                                                                                              |
| 2                                                         | Grants or contracts from any entity (if not indicated in item #1 above).                                                                                                       | <u>  </u> X <u>  </u> None                                                                   |                                                                                                                              |
|                                                           |                                                                                                                                                                                |                                                                                              |                                                                                                                              |
| 3                                                         | Royalties or licenses                                                                                                                                                          | <u>  </u> X <u>  </u> None                                                                   |                                                                                                                              |
|                                                           |                                                                                                                                                                                |                                                                                              |                                                                                                                              |

|    |                                                                                                              |                                                                 |                                                                                                                 |
|----|--------------------------------------------------------------------------------------------------------------|-----------------------------------------------------------------|-----------------------------------------------------------------------------------------------------------------|
|    |                                                                                                              |                                                                 |                                                                                                                 |
| 4  | Consulting fees                                                                                              | <input type="checkbox"/> <u>X</u> <input type="checkbox"/> None |                                                                                                                 |
|    |                                                                                                              |                                                                 |                                                                                                                 |
|    |                                                                                                              |                                                                 |                                                                                                                 |
| 5  | Payment or honoraria for lectures, presentations, speakers bureaus, manuscript writing or educational events | <input type="checkbox"/> <u>X</u> <input type="checkbox"/> None |                                                                                                                 |
|    |                                                                                                              |                                                                 |                                                                                                                 |
|    |                                                                                                              |                                                                 |                                                                                                                 |
| 6  | Payment for expert testimony                                                                                 | <input type="checkbox"/> <u>X</u> <input type="checkbox"/> None |                                                                                                                 |
|    |                                                                                                              |                                                                 |                                                                                                                 |
|    |                                                                                                              |                                                                 |                                                                                                                 |
| 7  | Support for attending meetings and/or travel                                                                 | <input type="checkbox"/> <u>X</u> <input type="checkbox"/> None |                                                                                                                 |
|    |                                                                                                              |                                                                 |                                                                                                                 |
|    |                                                                                                              |                                                                 |                                                                                                                 |
| 8  | Patents planned, issued or pending                                                                           | <input type="checkbox"/> <u>X</u> <input type="checkbox"/> None |                                                                                                                 |
|    |                                                                                                              |                                                                 |                                                                                                                 |
|    |                                                                                                              |                                                                 |                                                                                                                 |
| 9  | Participation on a Data Safety Monitoring Board or Advisory Board                                            | <input type="checkbox"/> <u>X</u> <input type="checkbox"/> None |                                                                                                                 |
|    |                                                                                                              |                                                                 |                                                                                                                 |
|    |                                                                                                              |                                                                 |                                                                                                                 |
| 10 | Leadership or fiduciary role in other board, society, committee or advocacy group, paid or unpaid            | <input type="checkbox"/> <u>X</u> <input type="checkbox"/> None |                                                                                                                 |
|    |                                                                                                              |                                                                 |                                                                                                                 |
|    |                                                                                                              |                                                                 |                                                                                                                 |
| 11 | Stock or stock options                                                                                       | NERv Technology Inc. (DBA FluidAI Medical)                      | I own stocks at FluidAI Medical which focuses on the early predication of leaks after gastrointestinal surgery. |
|    |                                                                                                              |                                                                 |                                                                                                                 |
|    |                                                                                                              |                                                                 |                                                                                                                 |
| 12 | Receipt of equipment, materials, drugs, medical writing, gifts or other services                             | <input type="checkbox"/> <u>X</u> <input type="checkbox"/> None |                                                                                                                 |
|    |                                                                                                              |                                                                 |                                                                                                                 |
|    |                                                                                                              |                                                                 |                                                                                                                 |
| 13 | Other financial or non-financial interests                                                                   | <input type="checkbox"/> <u>X</u> <input type="checkbox"/> None |                                                                                                                 |
|    |                                                                                                              |                                                                 |                                                                                                                 |
|    |                                                                                                              |                                                                 |                                                                                                                 |

**Please summarize the above conflict of interest in the following box:**

I am a full-time employee at FluidAI Medical which focuses on the early predication of leaks after gastrointestinal Surgery. The author's role at FluidAI involves expertise in the topics explored within this article. The author also holds stock options with FluidAI. The author declares no other conflicts of interest.

Please place an "X" next to the following statement to indicate your agreement:

I certify that I have answered every question and have not altered the wording of any of the questions on this form.
