# Supplementary figures and images for: Hepatobiliary anastomotic leakage: a narrative review of definitions, grading systems, and consequences of leaks
Source: PubMed Central journal article supplement — Transl Gastroenterol Hepatol. 2024 Sep 13;9:70. doi: 10.21037/tgh-24-9 (PMC11535784; doi:10.21037/tgh-24-9), 2024-09-13

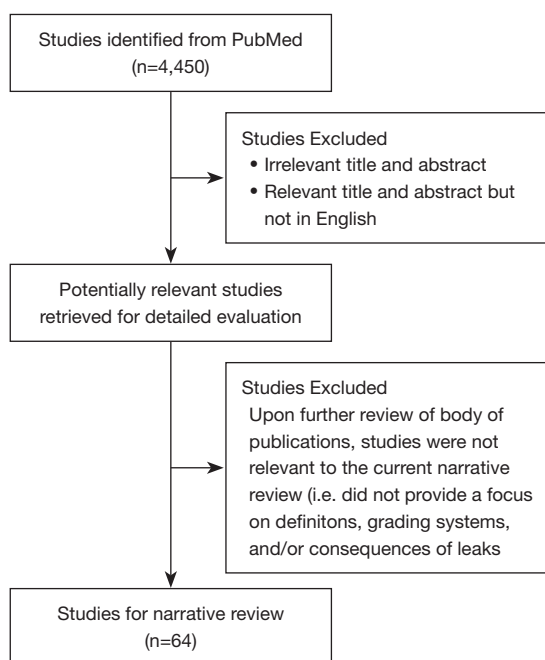

**Figure S1** Detailed search strategy of one database as an example (PubMed).

Supplement: tgh-09-24-9-supplementary.pdf [file tgh-09-24-9-supplementary.pdf]
